# Supplementary material for: A photo-responsive p-Si/TiO2/Ag heterostructure with charge transfer for recyclable surface-enhanced Raman scattering substrates
Source: Royal Society of Chemistry journal article supplement (doi:10.1039/d1ce01310f), 2021-12-28
Supplement: d1ce01310f1.pdf [file d1ce01310f1.pdf]

ARTICLE

Received 00th January 20xx,  
Accepted 00th January 20xx

DOI: 10.1039/x0xx00000x

## A Photo-responsive p-Si/TiO<sub>2</sub>/Ag Heterostructure with Charge Transfer for Recyclable Surface-Enhanced Raman Scattering Substrate

Zhezhe Wang<sup>a,b,c</sup>, Yueting Lai<sup>d,e</sup>, Jieyi Cai<sup>a</sup>, Siyi Jia<sup>a</sup>, Lin Lin<sup>a,b,c</sup>,  
Zhuohong Feng<sup>a,b,c</sup>, Zhiqiang Zheng<sup>a,b,c</sup>, Rongrong Xie<sup>\*d</sup>,  
Jiabing Li<sup>\*d</sup>

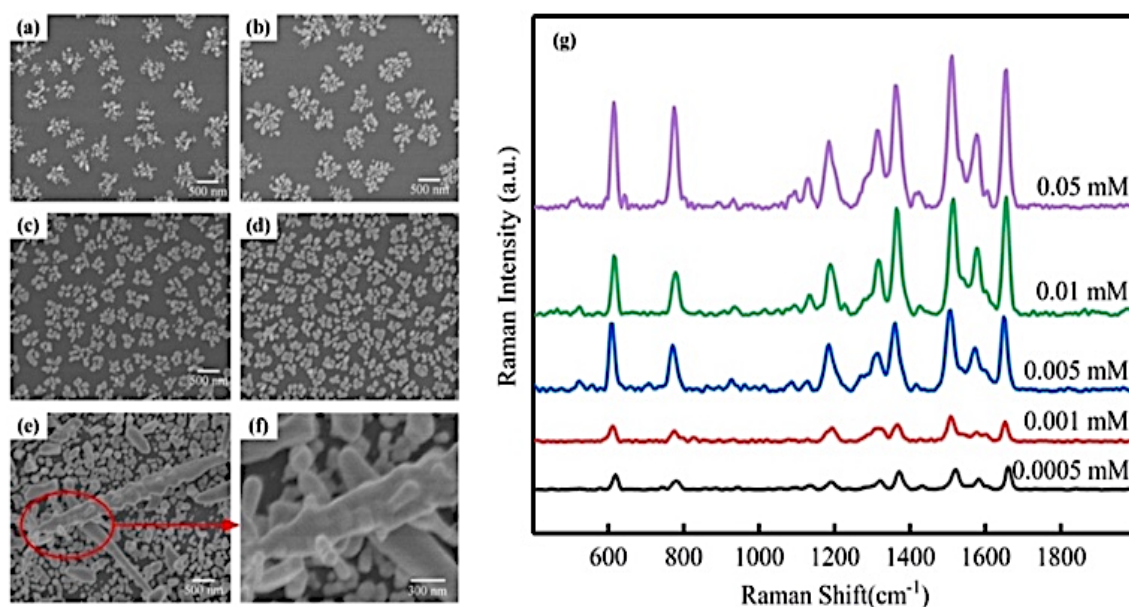

Fig. S1 SEM images of Ag nanoflowers prepared on Si/ TiO<sub>2</sub> substrates with different AgNO<sub>3</sub> concentrations and SERS spectra of R6G absorbed on Si/TiO<sub>2</sub>/Ag substrates. (a)~(e) are the SEM images of Ag nanoflowers with the AgNO<sub>3</sub> concentrations of 0.0005 mM, 0.001 mM, 0.005 mM, 0.01 mM, 0.05 mM sequentially. (f) is the magnification image of the selected in (e). (g) is the SERS spectra of 10<sup>-5</sup> M R6G absorbed on the corresponding substrates.

<sup>a</sup> College of Physics and Energy, Fujian Normal University, Fujian Provincial Key Laboratory of Quantum Manipulation and New Energy Materials, Fuzhou, 350117, China.

<sup>b</sup> Fujian Provincial Engineering Technology Research Center of Solar Energy Conversion and Energy Storage, Fuzhou, 350117, China.

<sup>c</sup> Fujian Provincial Collaborative Innovation Center for Advanced High-Field Superconducting Materials and Engineering, Fuzhou, 350117, China

<sup>d</sup> College of Environmental Science and Engineering, Fujian Normal University, Fuzhou, 350007, China

<sup>e</sup> Fujian College of Water Conservancy and Electric Power, Sanming, 366000, China

E-mail addresses: [lijabing@fjnu.edu.cn](mailto:lijabing@fjnu.edu.cn) (J. Li), [xierr1118@163.com](mailto:xierr1118@163.com) (R. Xie)

See DOI: 10.1039/x0xx00000x

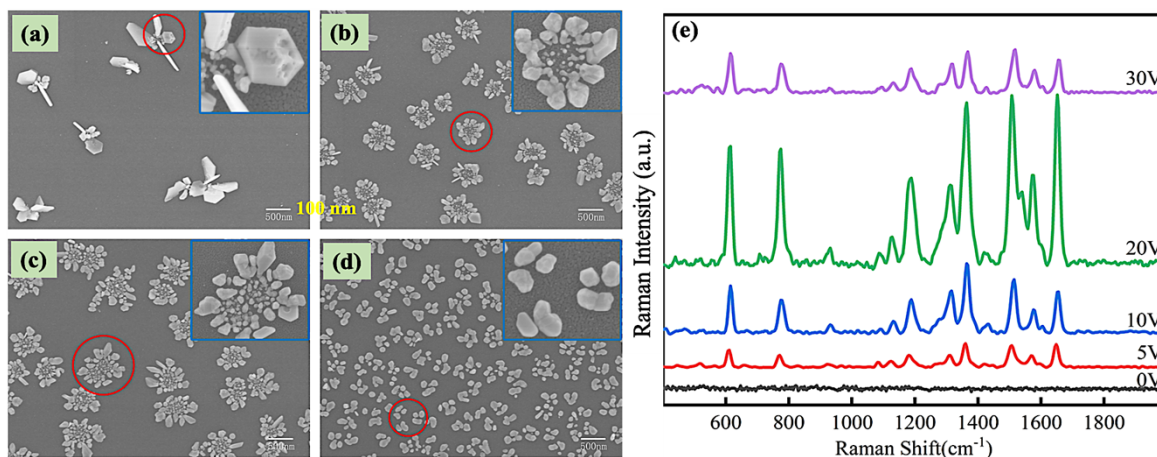

Fig. S2 SEM images of Ag nanoflowers deposited on TiO<sub>2</sub> thin film substrate with different applied voltages (a-d represent 5V, 10V, 20V and 30V, respectively) and the corresponding SERS spectra of R6G absorbed on it (e).

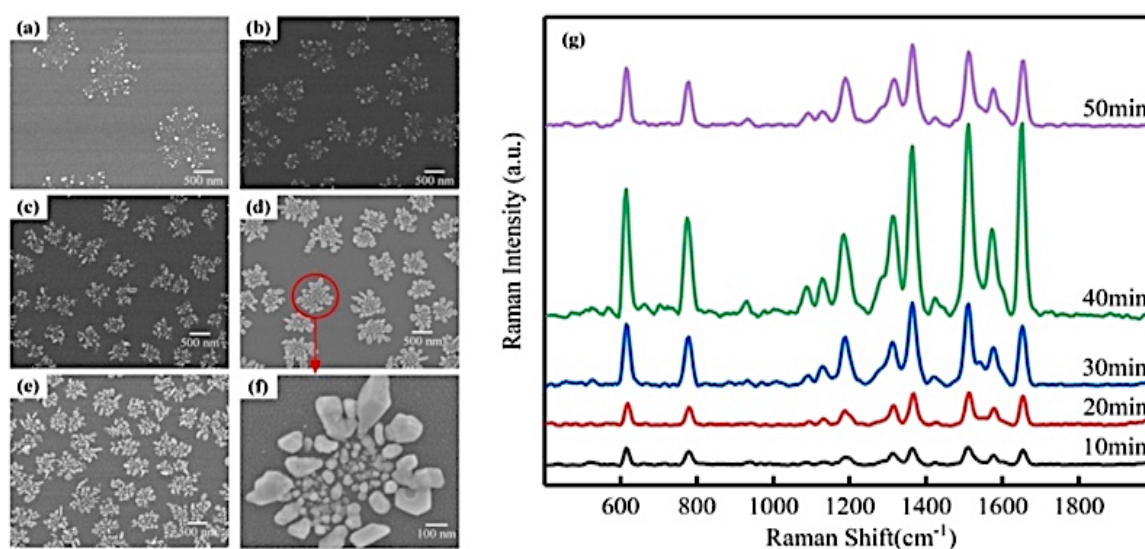

Fig. S3 SEM images of Ag nanoflowers on TiO<sub>2</sub> substrates prepared with different reaction times (a-f) and the corresponding SERS spectra of the 10<sup>-5</sup>M R6G (g).

The band gap energy ( $E_g$ ) of TiO<sub>2</sub> is determined based on UV-Vis Spectra (UV-2450, Shimadzu). According to the formula:

$$\left(\frac{Ah\nu}{K}\right)^{1/2} = h\nu - E_g$$

, the  $E_g$  of TiO<sub>2</sub> is about 3.22 eV, as seen from the following Fig. S4.

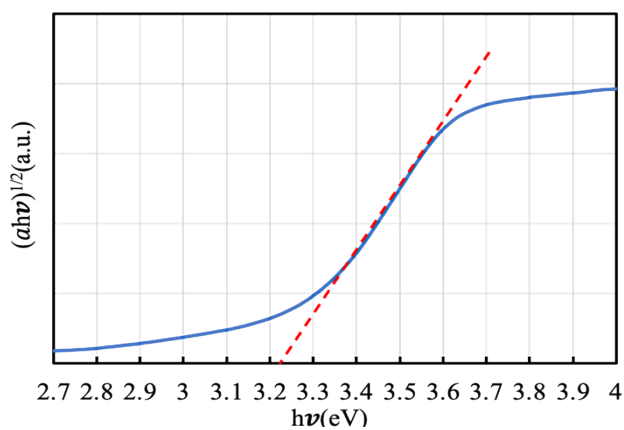

Fig.S4 Energy gap of TiO<sub>2</sub> based on UV -Vis spectra

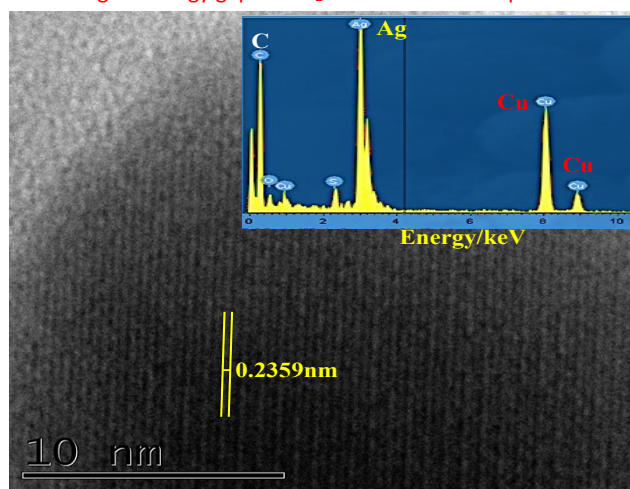

Fig. S5 the HR-TEM image of Ag and the inserted EDS result

The EF calculated formula is as follows:

$$EF = (I_{\text{SERS}}/N_{\text{SERS}}) / (I_{\text{Normal}}/N_{\text{Normal}})$$

Here,  $I_{\text{SERS}}$  and  $I_{\text{Normal}}$  is the Raman intensity of SERS and normal Raman spectrum of R6G, respectively. The  $N_{\text{SERS}}$  and  $N_{\text{Normal}}$  is the concentration of R6G, respectively. In our experiment, the SERS peak at  $1649 \text{ cm}^{-1}$  is selected and the EF is estimated to be about  $1.23 \times 10^{12}$ .
